# Supplementary material for: Influence of water concentration on the solvothermal synthesis of VO2(B) nanocrystals
Source: Royal Society of Chemistry journal article supplement (doi:10.1039/d2ce00813k), 2022-01-01
Supplement: d2ce00813k1.pdf [file d2ce00813k1.pdf]

Electronic Supporting Information (ESI)

## Influence of Water Concentration on the Solvothermal Synthesis of VO<sub>2</sub>(B)

### Nanocrystals

Brittney A. Beidelman, Xiaotian Zhang, Karla, R. Sanchez-Lievanos, Annabel V. Selino, Ellen M. Matson\*,  
and Kathryn E. Knowles\*

Department of Chemistry, University of Rochester, Rochester, New York 14627, USA.

\*Corresponding author email: [matson@chem.rochester.edu](mailto:matson@chem.rochester.edu), [kknowles@ur.rochester.edu](mailto:kknowles@ur.rochester.edu)

### Supporting Information Table of Contents:

|                                                                                                                                                     |     |
|-----------------------------------------------------------------------------------------------------------------------------------------------------|-----|
| <b>Table S1.</b> Previously reported reaction conditions for the synthesis of VO <sub>2</sub> (A) and (B).....                                      | S2  |
| Experimental Details of the Powder X-ray Diffraction Measurements.....                                                                              | S3  |
| MatLAB code used to model nanorod growth via end-to-end oriented attachment.....                                                                    | S4  |
| <b>Figure S1.</b> Powder X-ray diffraction of material recovered from a reaction run without water.....                                             | S5  |
| <b>Figure S2.</b> Fourier-transform infrared spectra of material recovered from a reaction run without water.                                       | S5  |
| <b>Figure S3.</b> Reproducibility of size distributions for VO <sub>2</sub> (B) nanorods synthesized in 20 equiv. of water....                      | S6  |
| <b>Figure S4.</b> Indexed powder X-ray diffraction patterns of VO <sub>2</sub> (A) and VO <sub>2</sub> (B).....                                     | S7  |
| <b>Figure S5.</b> SEM images of VO <sub>2</sub> (B) obtained with 20 equivalents and 100% water.....                                                | S8  |
| <b>Figure S6.</b> Powder X-ray diffraction spectra of nanocrystals synthesized in the presence of 20-400 equiv.<br>of water.....                    | S8  |
| <b>Figure S7.</b> Determination of the molar extinction coefficient of VO(acac) <sub>2</sub> .....                                                  | S9  |
| <b>Figure S8.</b> Electronic absorption spectra of supernatants from reactions run with 20 equiv. of water....                                      | S10 |
| <b>Figure S9.</b> Electronic absorption spectra of supernatants from reactions run with 200 equiv of water....                                      | S10 |
| <b>Figure S10.</b> Images of the supernatant solutions from 20 and 200 equivalent water reactions.....                                              | S11 |
| <b>Figure S11.</b> Average length of VO <sub>2</sub> (B) nanorods versus reaction time in the presence of 20 or 200 equiv.<br>of water.....         | S12 |
| <b>Figure S12.</b> High-resolution TEM and selected area electron diffraction of VO <sub>2</sub> (B) and VO <sub>2</sub> (A) NCs.....               | S12 |
| <b>Figure S13.</b> Powder X-ray diffraction of nanocrystals obtained from the attempt to convert VO <sub>2</sub> (B) to<br>VO <sub>2</sub> (A)..... | S13 |
| <b>References</b> .....                                                                                                                             | S13 |

**Table S1.** Previously reported reaction conditions for the synthesis of VO<sub>2</sub> (A) and (B).

| V Precursor                   | Ligands                                                        | Solvent | Temperature(°C)/<br>Time(hrs) | VO <sub>2</sub> phase and Shape                         | Ref       |
|-------------------------------|----------------------------------------------------------------|---------|-------------------------------|---------------------------------------------------------|-----------|
| V <sub>2</sub> O <sub>5</sub> | 2 equiv. NaHSO <sub>3</sub>                                    | Water   | 220/24                        | A, rods, 20 nm diameter and length of 0.1–1 μm          | 1         |
| V <sub>2</sub> O <sub>5</sub> | 1.5 equiv. oxalic acid                                         | Water   | 250/24                        | A, rods, 2-4μm length                                   | 2         |
| V <sub>2</sub> O <sub>5</sub> | 1-3 equiv. oxalic acid                                         | Water   | 230-270/24                    | A, rods, 2-20μm length                                  | 3         |
| V <sub>2</sub> O <sub>5</sub> | 2 equiv. oxalic acid                                           | Water   | 230/24                        | A, rods, 5 mm length, 150 nm width                      | 4         |
| V <sub>2</sub> O <sub>5</sub> | 1 equiv. quinol                                                | Water   | 180/24                        | B, rod bundles, 2-3μm length, 1μm thick                 | 5         |
| V <sub>2</sub> O <sub>5</sub> | 2 equiv. 4-butylaniline                                        | Water   | 180/48                        | B, rods, 2-3μm length, 80nm thick                       | 6         |
| V <sub>2</sub> O <sub>5</sub> | 26 equiv. H <sub>2</sub> O <sub>2</sub> ,<br>14 equiv. ethanol | Water   | 180/48                        | B, rods, 1-3μm length                                   | 7         |
| V <sub>2</sub> O <sub>5</sub> | 2 equiv. 2-phenylethylamine                                    | Water   | 180/48                        | B, belts, 3-10μm length, 66nm width                     | 8         |
| VO(acac) <sub>2</sub>         | None                                                           | Water   | 220/24                        | A, nanoplates, 20–40 nm wide and 100–200 nm long        | 9         |
| VO(acac) <sub>2</sub>         | 3.4 equiv. Ethanol                                             | Water   | 170-220/8-72                  | A, nanoribbons, 30nm diameter, 2-20μm length            | 10        |
| VO(acac) <sub>2</sub>         | None                                                           | Water   | 200/12                        | B, nanoplates, 150nm wide, 300nm long                   | 10        |
| VO(acac) <sub>2</sub>         | 4.7 equiv. PVP                                                 | Water   | 200/24                        | B, nanoflowers, 1-1.5μm diameter                        | 11        |
| VO(acac) <sub>2</sub>         | 4 equiv. Lauric acid, 2 equiv. water                           | Toluene | 200/24                        | A, platelets, 17.8± 6.5nm length/width, 4.5±1.2nm thick | This work |
| VO(acac) <sub>2</sub>         | 4 equiv. Lauric acid, 20 equiv. water                          | Toluene | 200/24                        | B, nanorods, 13.1±5.4nm width, 75.4±29.9nm length       | This work |

## Experimental Details of the Powder X-ray Diffraction Measurements

Powder samples were affixed to a Nylon loop (0.1 mm ID) with a light coating of viscous oil and mounted on a goniometer. X-ray diffraction data were collected on a Rigaku XtaLAB Synergy-S diffraction system equipped with a HyPix-6000HE HPC detector. Cu K $\alpha$  radiation ( $\lambda = 1.54184 \text{ \AA}$ ) and Mo K $\alpha$  radiation ( $\lambda = 0.71073 \text{ \AA}$ ) were generated by PhotonJet-S microfocus sources operated at 50 kV, 1 mA. Each data set was collected at room temperature. For each scan,  $\varphi$  was rotated through  $720^\circ$  in 300 s ( $2.4^\circ/\text{s}$ ). The sample-to-detector distance and  $w$ ,  $q$ , and  $k$  angles were fixed and optimized for each sample. Table S2 summarizes the parameters used for the spectra shown in Figure 1C in the main text.

**Table S2.** Parameters used to collect Powder X-ray Diffraction Spectra

|                             | 2 equiv. H <sub>2</sub> O <sup>a,c</sup>        | 4 equiv. H <sub>2</sub> O <sup>b</sup> | 12 equiv. H <sub>2</sub> O <sup>a</sup> | 20 equiv. H <sub>2</sub> O <sup>a</sup> |
|-----------------------------|-------------------------------------------------|----------------------------------------|-----------------------------------------|-----------------------------------------|
| Sample-to-detector distance | 33.2 mm                                         | 34.0 mm                                | 34.0 mm                                 | 33.2 mm                                 |
| $\omega$                    | scan 1: $-41.25^\circ$<br>scan 2: $40.47^\circ$ | $-13.02^\circ$                         | $-41.95^\circ$                          | $-41.18^\circ$                          |
| $\theta$                    | scan 1: $-41.25^\circ$<br>scan 2: $40.47^\circ$ | $-13.02^\circ$                         | $-41.95^\circ$                          | $-41.18^\circ$                          |
| $\kappa$                    | scan 1: $0^\circ$<br>scan 2: $0^\circ$          | $0^\circ$                              | $0^\circ$                               | $0^\circ$                               |

<sup>a</sup>Collected using Cu K $\alpha$  radiation,  $\lambda = 1.54184 \text{ \AA}$ . <sup>b</sup>Collected using Mo K $\alpha$  radiation,  $\lambda = 0.71073 \text{ \AA}$  <sup>c</sup>Spectrum reported in Figure 1C is the average of two scans.

In order to compare the peak positions observed in the spectrum collected with Mo K $\alpha$  radiation to those observed in the spectrum collected with Cu K $\alpha$  radiation, we converted the  $2\theta$  values obtained from the Mo K $\alpha$  collection ( $2\theta_{\text{Mo}}$ ) to those consistent with Cu K $\alpha$  radiation ( $2\theta_{\text{Cu}}$ ) using eq. S1, where  $\lambda_{\text{Cu}} = 1.54184 \text{ \AA}$  and  $\lambda_{\text{Mo}} = 0.71073 \text{ \AA}$ .

$$\sin \theta_{\text{Cu}} = \lambda_{\text{Cu}} \frac{\sin \theta_{\text{Mo}}}{\lambda_{\text{Mo}}} \quad (\text{S1})$$

We note that this converted spectrum was used exclusively for the purposes of phase identification by comparing peak positions to a reference spectrum.

### MatLAB code used to model oriented attachment (MatLAB version R2020a):

```
pd=fitdist(rxn_3hrs, 'Normal'); %define a probability distribution function
                                %based on a fit of the size distribution
                                %collected after 3 hours of reaction to a
                                %Normal distribution
rng('shuffle')                  %initiate random number generator
r=random(pd,10000,1);           %construct a column vector containing 10000
                                %random numbers generated using the
                                %probability distribution function pd.
                                %This is our model distribution.

r=abs(r);                       %ensure all numbers are positive

for c = 1:2000
    s=size(r);
    n=randperm(s(1),2);         %generate two random integers between 1 and the
                                %number of entries in the model distribution of
                                %rod lengths (r)
    new=r(n(1))+r(n(2));       %create a new entry for the model distribution
                                %equal to the sum of two randomly chosen entries
    r(n(1))=[];               %delete the randomly chosen entries from the
                                %model distribution
    if n(1) < n(2)
        r(n(2)-1)=[];
    else
        r(n(2))=[];
    end
    r=cat(1,r,new);           %add the new entry to the distribution
end
```

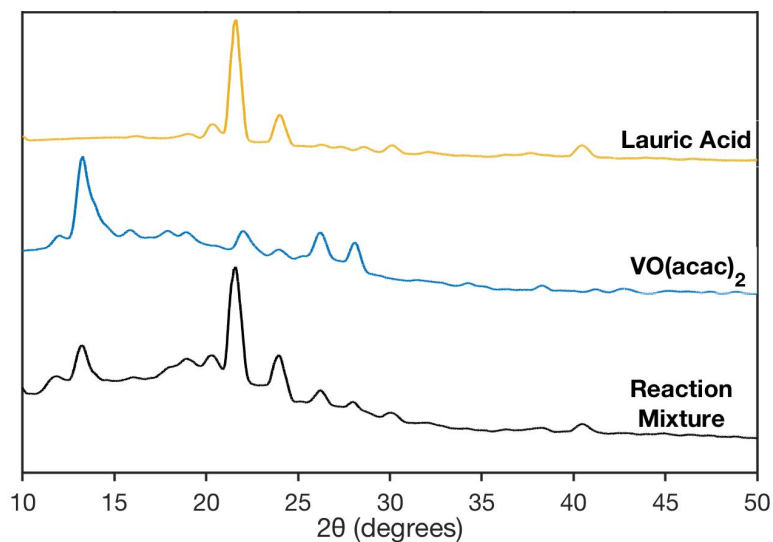

**Figure S1.** Powder X-ray diffraction spectra of the solid recovered from a reaction mixture containing 0.25 mmol of  $\text{VO}(\text{acac})_2$  and 1.0 mmol of lauric acid in dry toluene after heating to 200 °C for 24 hours (black),  $\text{VO}(\text{acac})_2$  (blue), and lauric acid (yellow). The diffraction peaks observed in the reaction mixture correspond to  $\text{VO}(\text{acac})_2$  and lauric acid.

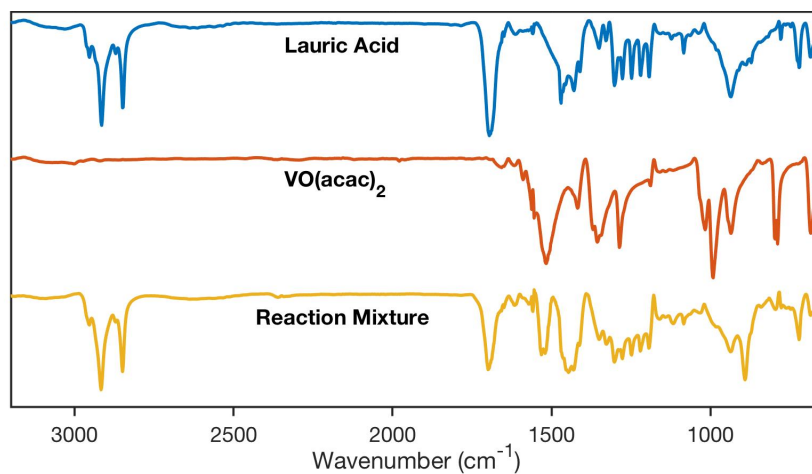

**Figure S2.** Fourier-transform infrared spectrum of the solid recovered from a reaction mixture containing  $\text{VO}(\text{acac})_2$ , lauric acid, and dry toluene after heating at 200 °C for 24 hours (yellow). FTIR spectra of lauric acid (blue) and  $\text{VO}(\text{acac})_2$  (red) are included for comparison. All of the peaks observed in the post-reaction mixture can be accounted for in the starting materials.

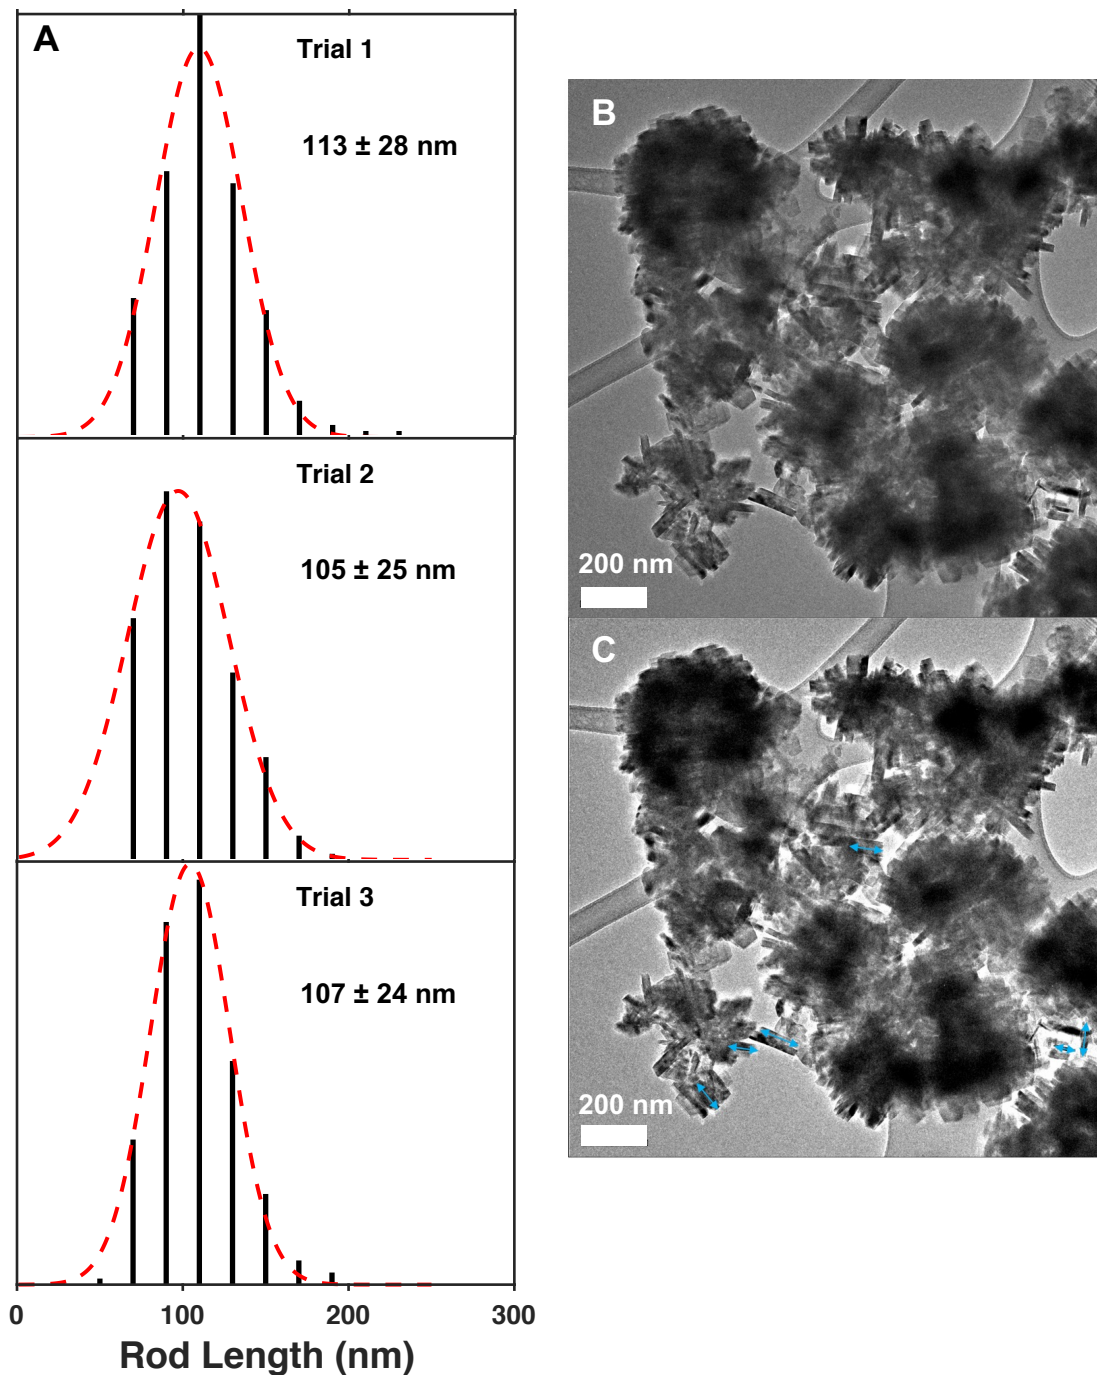

**Figure S3. A)** Histograms tabulating the lengths of VO<sub>2</sub>(B) nanorods measured by TEM for three different reactions run under the same conditions: VO(acac)<sub>2</sub> in the presence of 4 equivalents of lauric acid and 20 equivalents of water per vanadium centre. The dashed red lines represent Gaussian fits to the data and each plot is labeled with the average and standard deviation of the data set. **B,C)** Representative TEM images illustrating how the lengths of VO<sub>2</sub>(B) nanorods were measured. The image shown in part C was produced by increasing the contrast of the image in part B by 5%. Increasing the contrast improves the visibility of the edges of the nanocrystals and enables measurement of the nanorod lengths indicated by the blue double-headed arrows.

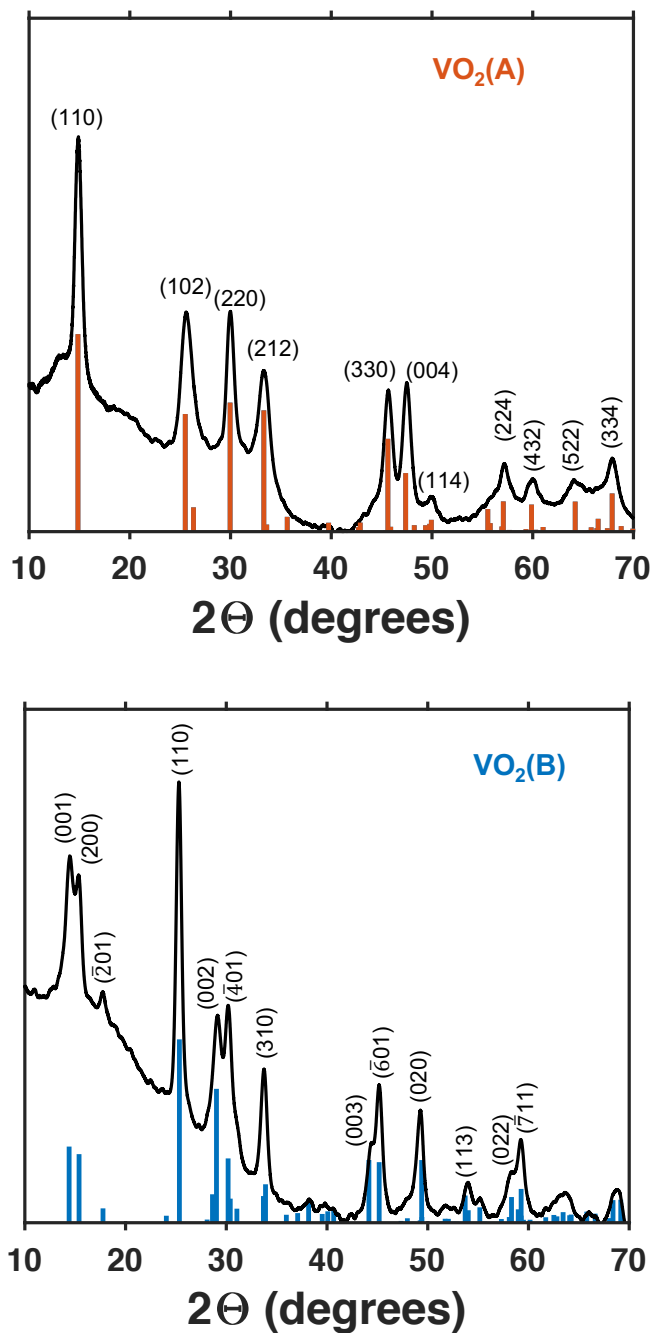

**Figure S4.** Indexed powder X-ray diffraction patterns for  $\text{VO}_2(\text{A})$  (top, orange) and  $\text{VO}_2(\text{B})$  (bottom, blue). The experimental spectra, plotted in black, are obtained from reactions of  $\text{VO}(\text{acac})_2$  in the presence of 2 equivalents (top) and 20 equivalents (bottom) of water. The vertical bars plot the standard patterns obtained from the JCPDS data base.  $\text{VO}_2(\text{A})$ : JCPDS 00-042-0876,  $\text{VO}_2(\text{B})$ : JCPDS 01-081-2392.

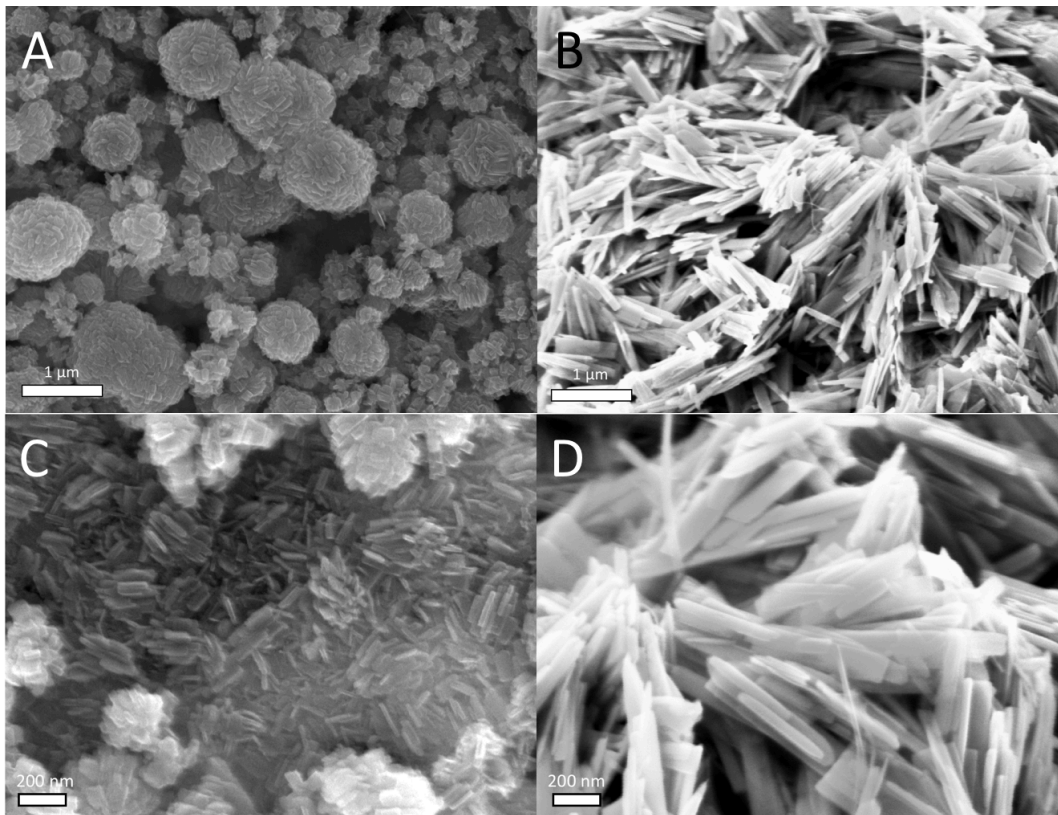

**Figure S5.** Scanning electron microscope images of  $\text{VO}_2(\text{B})$  nanobelts obtained from the reaction of  $\text{VO}(\text{acac})_2$  in toluene containing 20 equivalents of water (A, C) and the reaction of  $\text{VO}(\text{acac})_2$  in pure water (B, D). The scale bars in A, B correspond to  $1\ \mu\text{m}$  and the scale bars in C, D correspond to  $200\ \text{nm}$ .

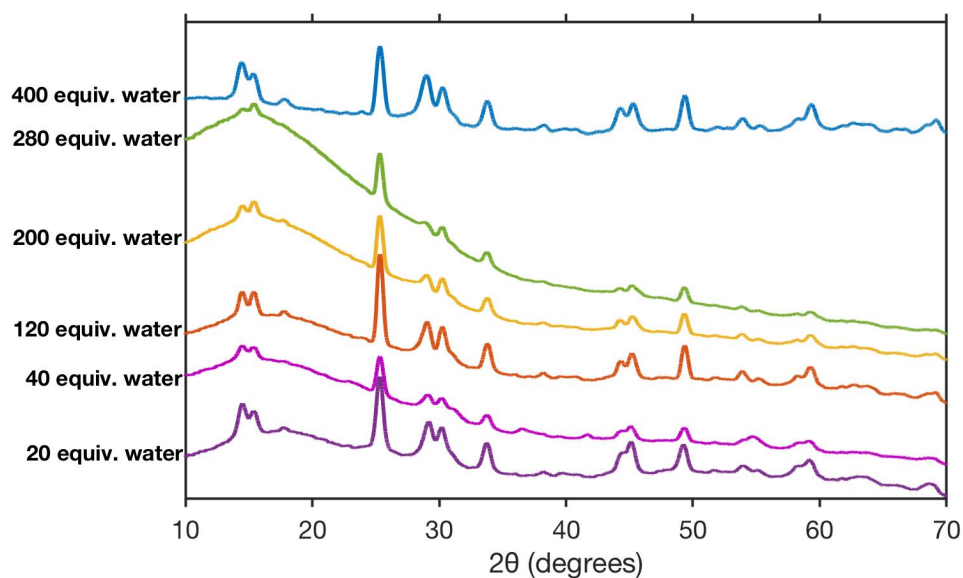

**Figure S6.** Powder X-ray diffraction spectra of nanocrystal products isolated from reaction mixtures containing  $\text{VO}(\text{acac})_2$ , four equivalents of lauric acid, and 20-400 equivalents of water. All of these reactions produced phase-pure  $\text{VO}_2(\text{B})$  (JCPDS card no. 01-081-2392).



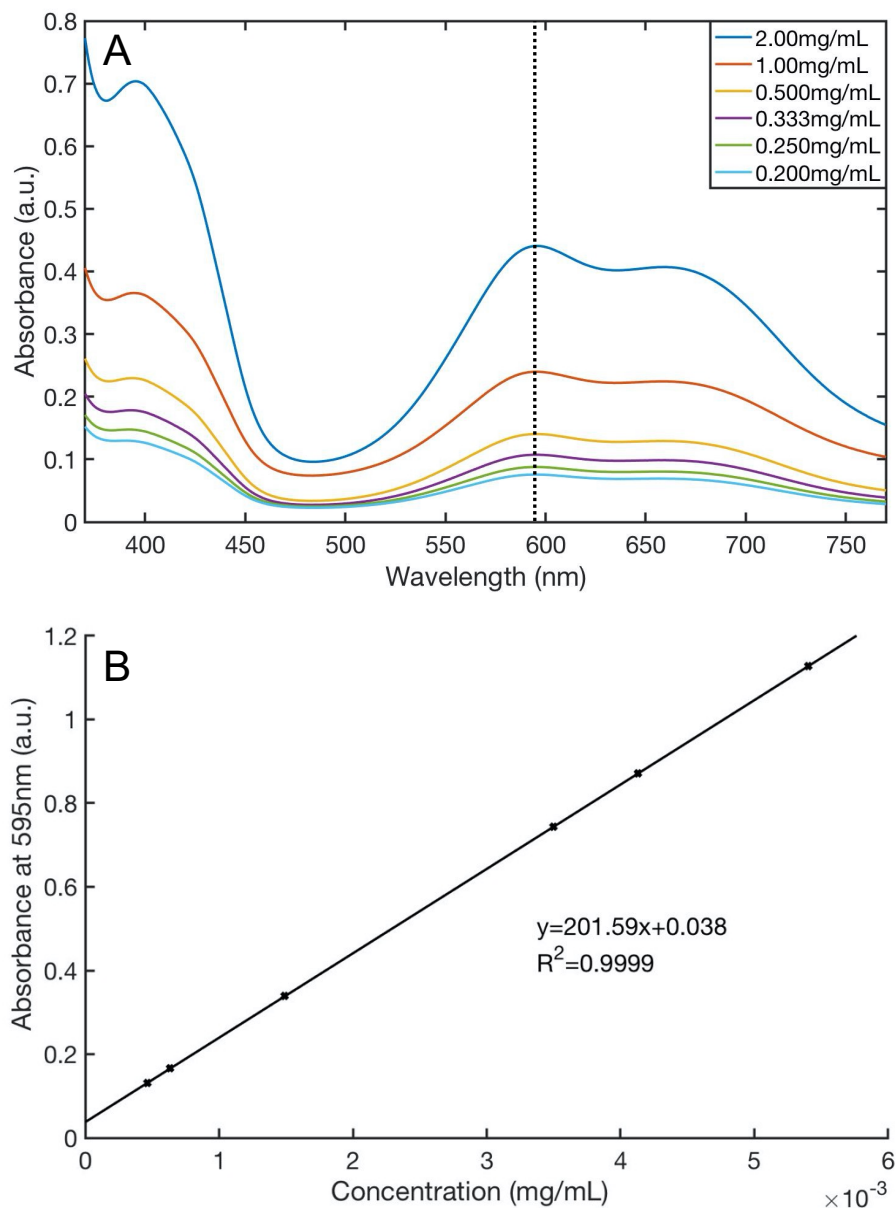

**Figure S7. A)** Electronic absorption spectra of solutions containing various concentrations of VO(acac)<sub>2</sub> in toluene measured in a 1-cm cuvette. The dotted black line indicates the wavelength at which the molar extinction coefficient was determined ( $\lambda = 595$  nm). The concentrations used were 2.00mg/mL, 1.00mg/mL, 0.500mg/mL, 0.333mg/mL, 0.250mg/mL, and 0.200mg/mL. These concentrations were obtained by serial dilutions of a stock solution with a concentration of 2.00mg/mL. **B)** Plot of absorbance at 595 nm extracted from the spectra shown in part **A** versus the concentration of VO(acac)<sub>2</sub> in toluene. A linear fit of these data produces a slope of 201.6 mL/mg, which corresponds to an extinction coefficient of  $\epsilon_{595} = 53460 \text{ M}^{-1} \text{ cm}^{-1}$ . The y-intercept corresponds to a small constant offset present in all of the spectra.

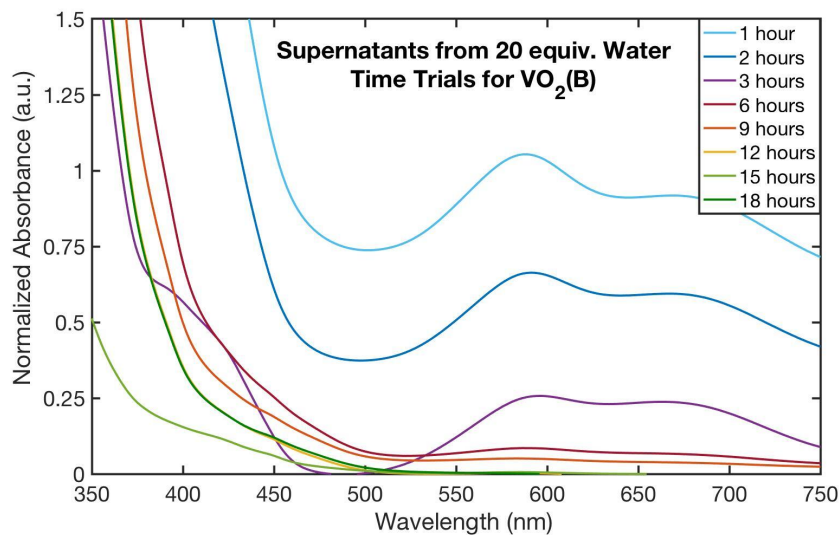

**Figure S8.** Electronic absorption spectra of supernatants collected from reactions run for various durations ranging from 1 - 18 hours in the presence of 20 equivalents of water.

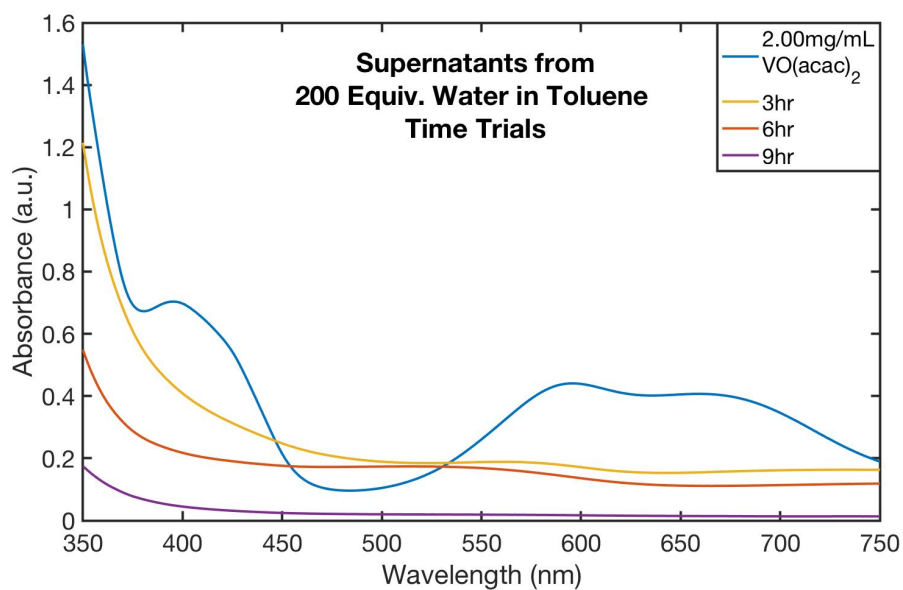

**Figure S9.** Electronic absorption spectra of supernatants collected from reactions run for 3 (orange), 6 (red), and 9 (purple) hours in the presence of 200 equivalents of water. A spectrum of a solution containing 2.00 mg/mL of VO(acac)<sub>2</sub> in toluene is plotted in blue for reference.

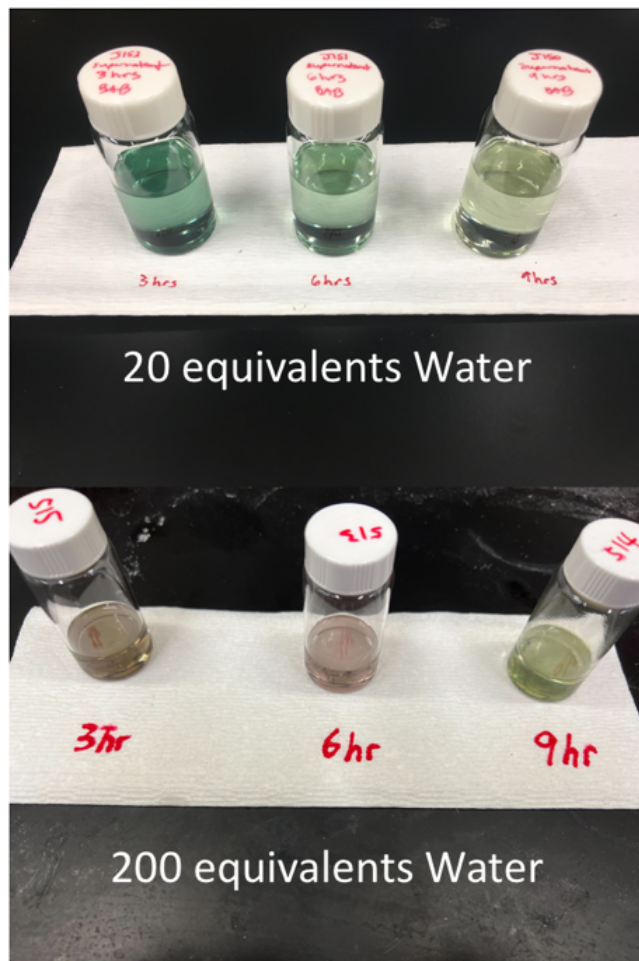

**Figure S10.** Photographs of supernatant solutions corresponding to the electronic absorption spectra plotted in figures S8 (top) and S9 (bottom). These samples contain solids recovered from rotovapped supernatant solutions that were subsequently redispersed in 10 mL of toluene and filtered. The blue-green color in the 3 and 6 hour samples run with 20 equivalents of water is characteristic of  $\text{VO}(\text{acac})_2$ . The brown color in the corresponding reaction times for 200 equivalents of water is consistent with incomplete separation of nanoparticle products from the supernatant.

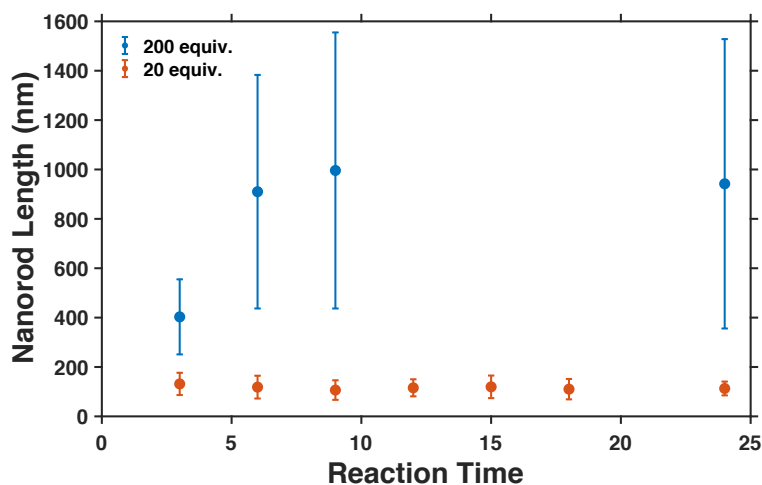

**Figure S11.** Plot of the average length of VO<sub>2</sub>(B) nanorods versus reaction time. The reaction mixtures contained VO(acac)<sub>2</sub>, 4 equivalents of lauric acid, and 20 (orange) or 200 (blue) equivalents of water in 10 mL of toluene. Each data point represents the average and standard deviation of 210 nanorod lengths measured via analysis of TEM images using ImageJ software.

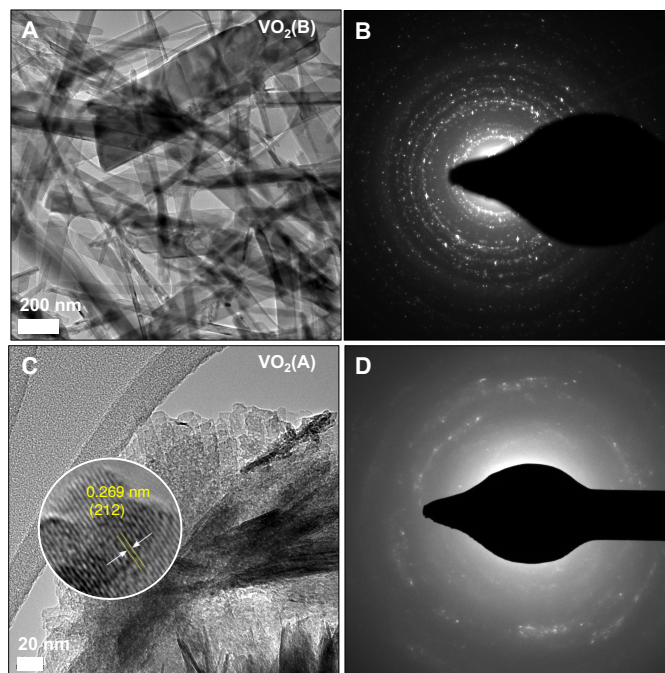

**Figure S12.** **A)** TEM image of VO<sub>2</sub>(B) nanorods obtained upon reaction of VO(acac)<sub>2</sub> with 200 equivalents of water for 24 hours. **B)** Selected area electron diffraction of the nanorods shown in **A**. **C)** TEM image of VO<sub>2</sub>(A) nanocrystals obtained upon reaction of VO(acac)<sub>2</sub> with 2 equivalents of water for 24 hours. Inset: High resolution TEM image in which the d-spacing for the (212) plane is resolved. **D)** Selected area electron diffraction of the nanocrystals shown in **C**.

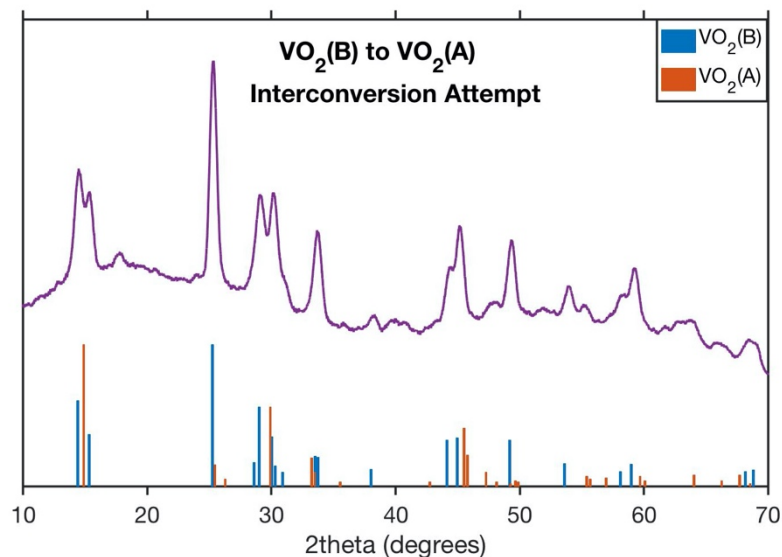

**Figure S13.** Powder X-ray diffraction spectrum of the nanocrystalline product obtained after reacting VO<sub>2</sub>(B) nanocrystals synthesized with 20 equivalents of water under conditions used for synthesizing VO<sub>2</sub>(A): 1 mmol lauric acid, 0.5 mmol water, and 10 mL toluene in an autoclave at 200 °C for 24 hours. The reaction yielded VO<sub>2</sub>(B), indicating that no phase transformation occurred under these conditions.

## References

1. Z. Liangmiao, J. Yao, Y. Guo, F. Xia, Y. Cui, B. Liu and Y. Gao, *Ceram. Int.*, 2018, **44**, 19301-19306.
2. S. Popuri, A. Artemenko, C. Labrugere, M. Miclau, A. Villesuzanne and M. Pollet, *J. Solid State Chem.*, 2014, **213**, 79-86.
3. S. Ji, F. Zhang and P. Jin, *J. Solid State Chem.*, 2011, **184**, 2285-2292.
4. X. H. Cheng, H. F. Xu, Z. Z. Wang, K. R. Zhu, G. Li and S. Jin, *Mater. Res. Bull.*, 2013, **48**, 3383-3388.
5. N. Ganganagappa and A. Siddaramanna, *Mater. Charact.*, 2012, **68**, 58-62.
6. L. Soltane and F. Sediri, *Mater. Res. Bull.*, 2014, **53**, 79-83.
7. Y. Zhang, *Mater. Sci.-Pol.*, 2016, **34**, 169-176.
8. F. Sediri and N. Gharbi, *Mater. Lett.*, 2009, **63**, 15-18.
9. L. Zhang, F. Xia, Z. Song, N. A. S. Webster, H. Luo and Y. Gao, *RSC Adv.*, 2015, **5**, 61371-61379.
10. S. Zhang, B. Shang, J. Yang, W. Yan, S. Wei and Y. Xie, *Phys. Chem. Chem. Phys.*, 2011, **13**, 15873-15881.
11. S. Zhang, Y. Li, C. Wu, F. Zheng and Y. Xie, *J. Phys. Chem. C*, 2009, **113**, 15058-15067.
